# Supplementary material for: Identification and validation of the dopamine agonist bromocriptine as a novel therapy for high-risk myelodysplastic syndromes and secondary acute myeloid leukemia
Source: PubMed Central journal article supplement (PMC4872736; doi:10.18632/oncotarget.6773), 2015-12-28
Supplement: oncotarget-07-6609-s001.pdf [file oncotarget-07-6609-s001.pdf]

## Identification and validation of the dopamine agonist bromocriptine as a novel therapy for high-risk myelodysplastic syndromes and secondary acute myeloid leukemia

### Supplementary Materials

#### Supplementary Table 1: List of genes in 50-50 signature used in sscMap analysis

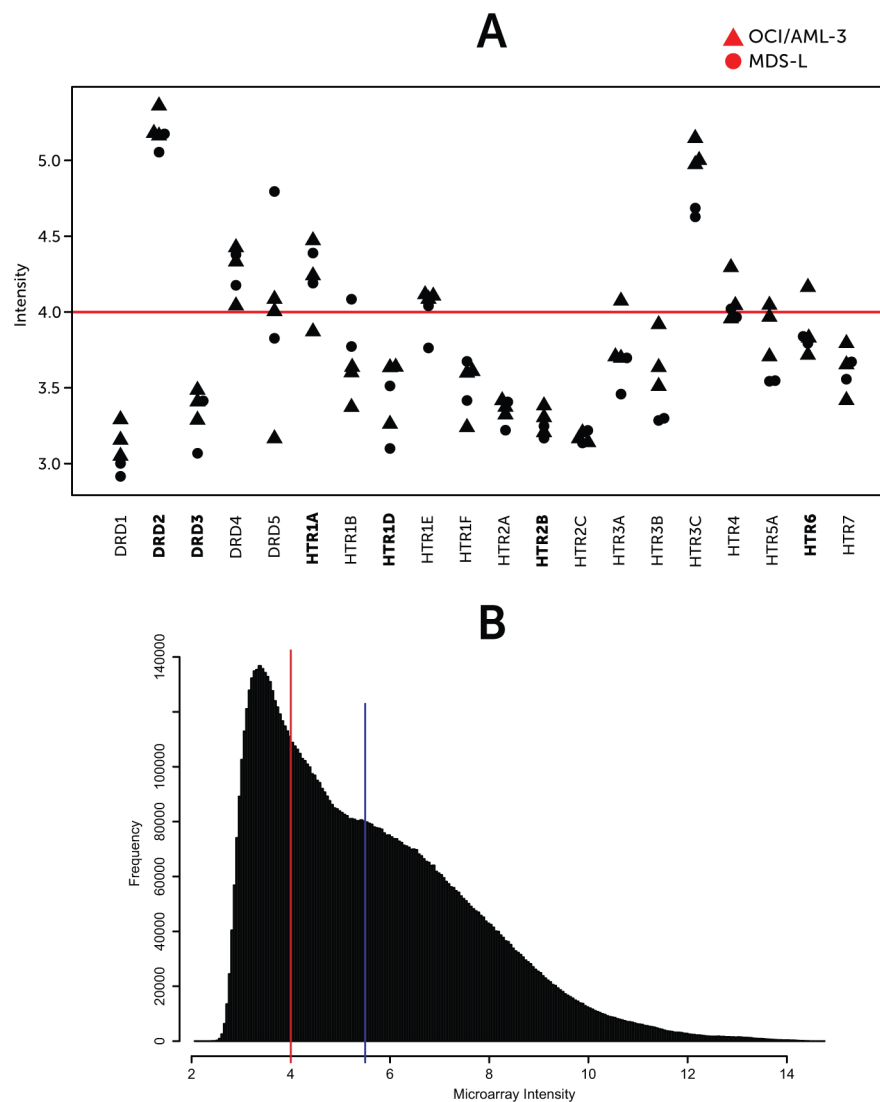

**Supplementary Figure S1: (A) Expression of dopamine and serotonin receptors on MDS-L and OCI/AML-3 cell lines.** Y-axis represents normalized microarray intensity value. Bold gene labels indicate receptors for which bromocriptine has been shown to have affinity ( $K_i < 100$  nM). Red-line indicates detection threshold for expression. **(B)** Histogram of normalized microarray intensity values for all samples included in the analysis. Red line signifies detection threshold for expression, as above. Blue line indicates threshold for low-expression genes.

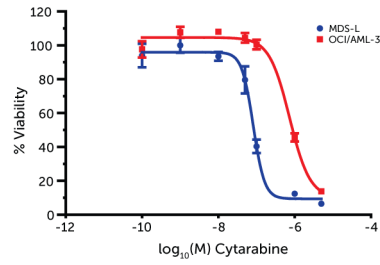

× Bromocriptine IC<sub>50</sub> | × Cytarabine IC<sub>50</sub>

|      | 0      | 0.25      | 0.5      | 1      | 2      |
|------|--------|-----------|----------|--------|--------|
| 0    | 0 0    | 0 0.25    | 0 0.5    | 0 1    | 0 2    |
| 0.25 | 0.25 0 | 0.25 0.25 | 0.25 0.5 | 0.25 1 | 0.25 2 |
| 0.5  | 0.5 0  | 0.5 0.25  | 0.5 0.5  | 0.5 1  | 0.5 2  |
| 1    | 1 0    | 1 0.25    | 1 0.5    | 1 1    | 1 2    |
| 2    | 2 0    | 2 0.25    | 2 0.5    | 2 1    | 2 2    |

| IC <sub>50</sub> | Bromocriptine | Cytarabine |
|------------------|---------------|------------|
| OCI/AML-3        | 6μM           | 736nM      |
| MDS-L            | 11μM          | 82nM       |

**Supplementary Figure S2: Dose-response curves for MDS-L and OCI/AML-3 cell lines treated with cytarabine.** Cell viability measured via ATP-based high-throughput assay normalized to vehicle-treated control. Drug doses are represented as logarithm base 10 of Molarity. Points represent averages from 3 replicates and error bars represent SEM. Tables illustrate treatment regime for synergy assay and IC<sub>50</sub> doses for MDS-L and OCI/AML-3 with bromocriptine and cytarabine.

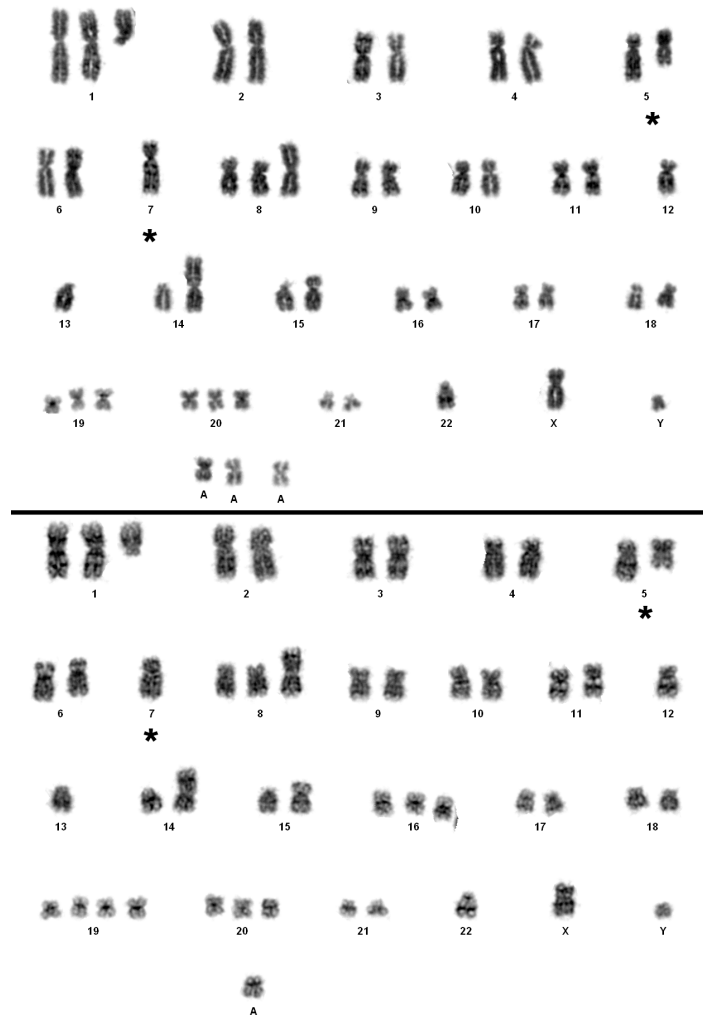

**Supplementary Figure S3: Two representative metaphase spreads from MDS-L cell line showing characteristic del(5q) and monosomy 7 (indicated by asterisks).**
